# Supplementary material for: Exposure of the African mound building termite, Macrotermes bellicosus workers to commercially formulated 2,4-D and atrazine caused high mortality and impaired locomotor response
Source: PubMed Central journal article supplement (PMC7093002; doi:10.1371/journal.pone.0230664), 2020-03-24

# PLOS ONE

## Exposure of the African mound building termite, *Macrotermes bellicosus* workers to 2,4-D and atrazine based herbicides caused high mortality and impaired locomotor response

--Manuscript Draft--

|                                                                                                                                                                                                                            |                                                                                                                                                                                                                                                                                                                                                                                                                                                                                                                                                                                                                                                                                                                                                                                                                                                                                                                                                                                                                                                                                                                                                                                                                                                                                                                                                                                                                                                                                                                                                                                                                                                                                                                                                                                                                                                                                                                                                                                                                                                                                                             |
|----------------------------------------------------------------------------------------------------------------------------------------------------------------------------------------------------------------------------|-------------------------------------------------------------------------------------------------------------------------------------------------------------------------------------------------------------------------------------------------------------------------------------------------------------------------------------------------------------------------------------------------------------------------------------------------------------------------------------------------------------------------------------------------------------------------------------------------------------------------------------------------------------------------------------------------------------------------------------------------------------------------------------------------------------------------------------------------------------------------------------------------------------------------------------------------------------------------------------------------------------------------------------------------------------------------------------------------------------------------------------------------------------------------------------------------------------------------------------------------------------------------------------------------------------------------------------------------------------------------------------------------------------------------------------------------------------------------------------------------------------------------------------------------------------------------------------------------------------------------------------------------------------------------------------------------------------------------------------------------------------------------------------------------------------------------------------------------------------------------------------------------------------------------------------------------------------------------------------------------------------------------------------------------------------------------------------------------------------|
| <b>Manuscript Number:</b>                                                                                                                                                                                                  | PONE-D-19-19112                                                                                                                                                                                                                                                                                                                                                                                                                                                                                                                                                                                                                                                                                                                                                                                                                                                                                                                                                                                                                                                                                                                                                                                                                                                                                                                                                                                                                                                                                                                                                                                                                                                                                                                                                                                                                                                                                                                                                                                                                                                                                             |
| <b>Article Type:</b>                                                                                                                                                                                                       | Research Article                                                                                                                                                                                                                                                                                                                                                                                                                                                                                                                                                                                                                                                                                                                                                                                                                                                                                                                                                                                                                                                                                                                                                                                                                                                                                                                                                                                                                                                                                                                                                                                                                                                                                                                                                                                                                                                                                                                                                                                                                                                                                            |
| <b>Full Title:</b>                                                                                                                                                                                                         | Exposure of the African mound building termite, <i>Macrotermes bellicosus</i> workers to 2,4-D and atrazine based herbicides caused high mortality and impaired locomotor response                                                                                                                                                                                                                                                                                                                                                                                                                                                                                                                                                                                                                                                                                                                                                                                                                                                                                                                                                                                                                                                                                                                                                                                                                                                                                                                                                                                                                                                                                                                                                                                                                                                                                                                                                                                                                                                                                                                          |
| <b>Short Title:</b>                                                                                                                                                                                                        | Atrazine and 2, 4-D caused high mortality and reduced mobility in termites                                                                                                                                                                                                                                                                                                                                                                                                                                                                                                                                                                                                                                                                                                                                                                                                                                                                                                                                                                                                                                                                                                                                                                                                                                                                                                                                                                                                                                                                                                                                                                                                                                                                                                                                                                                                                                                                                                                                                                                                                                  |
| <b>Corresponding Author:</b>                                                                                                                                                                                               | Osariyekemwen O. Uyi, Ph.D<br>University of Benin<br>Benin City, Edo NIGERIA                                                                                                                                                                                                                                                                                                                                                                                                                                                                                                                                                                                                                                                                                                                                                                                                                                                                                                                                                                                                                                                                                                                                                                                                                                                                                                                                                                                                                                                                                                                                                                                                                                                                                                                                                                                                                                                                                                                                                                                                                                |
| <b>Keywords:</b>                                                                                                                                                                                                           | Beneficial insects; termites; herbicides; 2, 4,-D; atrazine; toxicity; locomotion.                                                                                                                                                                                                                                                                                                                                                                                                                                                                                                                                                                                                                                                                                                                                                                                                                                                                                                                                                                                                                                                                                                                                                                                                                                                                                                                                                                                                                                                                                                                                                                                                                                                                                                                                                                                                                                                                                                                                                                                                                          |
| <b>Abstract:</b>                                                                                                                                                                                                           | Recent empirical evidence suggests that herbicides have damaging effects on non-target organisms in both natural and semi-natural ecosystems. The African mound building termite, <i>Macrotermes bellicosus</i> , is an important beneficial insect that functions as an ecosystem engineer due to its role in the breakdown of dead and decaying materials. Here, we examined the effects of 2,4-D amine salt (2,4-D) and atrazine based herbicides viz. Vestamine® and Ultrazine® on the survival and locomotion response of <i>M. bellicosus</i> . Worker termites were treated with a range of concentrations of 2,4-D amine salt (the recommended concentration: 6.25 ml per 500 ml of water, 0.25- and 0.5-fold below the recommended concentration and distilled water as control) and atrazine (the recommended concentration: 3.75 ml per 500 ml of water, 0.25-, 0.5-, 2.0- and 4-fold of the recommended concentration and distilled water as control) for 24 hours for the mortality test, and allowed to run for 15 seconds for the locomotion trial. All concentrations of both Vestamine® and Ultrazine® were highly toxic to worker termites and mortality increased as the concentration and time after treatment increased. For both herbicides, concentrations far less than the recommended rates caused 100% mortality. The distance travelled and speed of termites were significantly influenced by both Vestamine® and Ultrazine® as termites exposed to all tested concentrations of the herbicides exhibited reduced running speed and travelled shorter distances than the control. These findings suggest that beneficial insects, especially <i>M. bellicosus</i> may experience high mortality (up to 100%) and reduced mobility if they are sprayed upon or come in contact with plant materials that have been freshly sprayed with (less or more than) the recommended concentration of Vestamine® and Ultrazine®. The findings of our study calls for the reassessment of the usage of 2,4-D and atrazine based herbicides in weed control in termite populated habitats. |
| <b>Order of Authors:</b>                                                                                                                                                                                                   | Afure J Ejomah<br>Osariyekemwen O. Uyi, Ph.D<br>Sese-Owei Ekaye                                                                                                                                                                                                                                                                                                                                                                                                                                                                                                                                                                                                                                                                                                                                                                                                                                                                                                                                                                                                                                                                                                                                                                                                                                                                                                                                                                                                                                                                                                                                                                                                                                                                                                                                                                                                                                                                                                                                                                                                                                             |
| <b>Additional Information:</b>                                                                                                                                                                                             |                                                                                                                                                                                                                                                                                                                                                                                                                                                                                                                                                                                                                                                                                                                                                                                                                                                                                                                                                                                                                                                                                                                                                                                                                                                                                                                                                                                                                                                                                                                                                                                                                                                                                                                                                                                                                                                                                                                                                                                                                                                                                                             |
| <b>Question</b>                                                                                                                                                                                                            | <b>Response</b>                                                                                                                                                                                                                                                                                                                                                                                                                                                                                                                                                                                                                                                                                                                                                                                                                                                                                                                                                                                                                                                                                                                                                                                                                                                                                                                                                                                                                                                                                                                                                                                                                                                                                                                                                                                                                                                                                                                                                                                                                                                                                             |
| <b>Financial Disclosure</b>                                                                                                                                                                                                | The author(s) received no specific funding for this work.                                                                                                                                                                                                                                                                                                                                                                                                                                                                                                                                                                                                                                                                                                                                                                                                                                                                                                                                                                                                                                                                                                                                                                                                                                                                                                                                                                                                                                                                                                                                                                                                                                                                                                                                                                                                                                                                                                                                                                                                                                                   |
| Enter a financial disclosure statement that describes the sources of funding for the work included in this submission. Review the <a href="#">submission guidelines</a> for detailed requirements. View published research |                                                                                                                                                                                                                                                                                                                                                                                                                                                                                                                                                                                                                                                                                                                                                                                                                                                                                                                                                                                                                                                                                                                                                                                                                                                                                                                                                                                                                                                                                                                                                                                                                                                                                                                                                                                                                                                                                                                                                                                                                                                                                                             |

articles from [PLOS ONE](#) for specific examples.

This statement is required for submission and **will appear in the published article** if the submission is accepted. Please make sure it is accurate.

#### Unfunded studies

Enter: *The author(s) received no specific funding for this work.*

#### Funded studies

Enter a statement with the following details:

- Initials of the authors who received each award
- Grant numbers awarded to each author
- The full name of each funder
- URL of each funder website
- Did the sponsors or funders play any role in the study design, data collection and analysis, decision to publish, or preparation of the manuscript?
- **NO** - Include this sentence at the end of your statement: *The funders had no role in study design, data collection and analysis, decision to publish, or preparation of the manuscript.*
- **YES** - Specify the role(s) played.

\* typeset

#### Competing Interests

Use the instructions below to enter a competing interest statement for this submission. On behalf of all authors, disclose any [competing interests](#) that could be perceived to bias this work—acknowledging all financial support and any other relevant financial or non-financial competing interests.

This statement **will appear in the published article** if the submission is accepted. Please make sure it is accurate. View published research articles from [PLOS ONE](#) for specific examples.

The authors have declared that no competing interests exist.

**NO authors have competing interests**

Enter: *The authors have declared that no competing interests exist.*

**Authors with competing interests**

Enter competing interest details beginning with this statement:

*I have read the journal's policy and the authors of this manuscript have the following competing interests: [insert competing interests here]*

\* typeset

**Ethics Statement**

N/A

Enter an ethics statement for this submission. This statement is required if the study involved:

- Human participants
- Human specimens or tissue
- Vertebrate animals or cephalopods
- Vertebrate embryos or tissues
- Field research

Write "N/A" if the submission does not require an ethics statement.

General guidance is provided below. Consult the [submission guidelines](#) for detailed instructions. **Make sure that all information entered here is included in the Methods section of the manuscript.**

**Format for specific study types**

**Human Subject Research (involving human participants and/or tissue)**

- Give the name of the institutional review board or ethics committee that approved the study
- Include the approval number and/or a statement indicating approval of this research
- Indicate the form of consent obtained (written/oral) or the reason that consent was not obtained (e.g. the data were analyzed anonymously)

**Animal Research (involving vertebrate animals, embryos or tissues)**

- Provide the name of the Institutional Animal Care and Use Committee (IACUC) or other relevant ethics board that reviewed the study protocol, and indicate whether they approved this research or granted a formal waiver of ethical approval
- Include an approval number if one was obtained
- If the study involved *non-human primates*, add *additional details* about animal welfare and steps taken to ameliorate suffering
- If anesthesia, euthanasia, or any kind of animal sacrifice is part of the study, include briefly which substances and/or methods were applied

**Field Research**

Include the following details if this study involves the collection of plant, animal, or other materials from a natural setting:

- Field permit number
- Name of the institution or relevant body that granted permission

**Data Availability**

Authors are required to make all data underlying the findings described fully available, without restriction, and from the time of publication. PLOS allows rare exceptions to address legal and ethical concerns. See the [PLOS Data Policy](#) and [FAQ](#) for detailed information.

Yes - all data are fully available without restriction

A Data Availability Statement describing where the data can be found is required at submission. Your answers to this question constitute the Data Availability Statement and **will be published in the article**, if accepted.

**Important:** Stating 'data available on request from the author' is not sufficient. If your data are only available upon request, select 'No' for the first question and explain your exceptional situation in the text box.

Do the authors confirm that all data underlying the findings described in their manuscript are fully available without restriction?

**Describe where the data may be found in full sentences. If you are copying our sample text, replace any instances of XXX with the appropriate details.**

- If the data are **held or will be held in a public repository**, include URLs, accession numbers or DOIs. If this information will only be available after acceptance, indicate this by ticking the box below. For example: *All XXX files are available from the XXX database (accession number(s) XXX, XXX).*
- If the data are all contained **within the manuscript and/or Supporting Information files**, enter the following:  
*All relevant data are within the manuscript and its Supporting Information files.*
- If neither of these applies but you are able to provide **details of access elsewhere**, with or without limitations, please do so. For example:

*Data cannot be shared publicly because of [XXX]. Data are available from the XXX Institutional Data Access / Ethics Committee (contact via XXX) for researchers who meet the criteria for access to confidential data.*

*The data underlying the results presented in the study are available from (include the name of the third party*

All relevant data are within the manuscript

*and contact information or URL).*

- This text is appropriate if the data are owned by a third party and authors do not have permission to share the data.

\* typeset

Additional data availability information:

1 **Exposure of the African mound building termite, *Macrotermes bellicosus* workers to 2,4-D**  
2 **and atrazine based herbicides caused high mortality and impaired locomotor response**

3

4 **Afure J. Ejomah<sup>1</sup>, Osariyekemwen O. Uyi<sup>1,2\*#</sup> and Sese-Owei Ekaye<sup>1</sup>**

5

6 <sup>1</sup>Department of Animal and Environmental Biology, University of Benin, Benin City, Nigeria

7

8 <sup>2</sup>Department of Zoology and Entomology, University of Fort Hare, Alice 5700, South Africa

9

10 <sup>#</sup>Department of Ecosystem Science and Management, Pennsylvania State University, University  
11 Park, United States of America

12

13 \*Corresponding author: [osariyekemwen.uyi@uniben.edu](mailto:osariyekemwen.uyi@uniben.edu)

14 <sup>#</sup>Current address

15

16 **Short title:** Atrazine and 2, 4-D caused high mortality and reduced mobility in termites

17

18

19

20

21

22

23

24

25

## 26 **Abstract**

27 Recent empirical evidence suggests that herbicides have damaging effects on non-target organisms  
28 in both natural and semi-natural ecosystems. The African mound building termite, *Macrotermes*  
29 *bellicosus*, is an important beneficial insect that functions as an ecosystem engineer due to its role  
30 in the breakdown of dead and decaying materials. Here, we examined the effects of 2,4-D amine  
31 salt (2,4-D) and atrazine based herbicides viz. Vestamine<sup>®</sup> and Ultrazine<sup>®</sup> on the survival and  
32 locomotion response of *M. bellicosus*. Worker termites were treated with a range of concentrations  
33 of 2,4-D amine salt (the recommended concentration: 6.25 ml per 500 ml of water, 0.25- and 0.5-  
34 fold below the recommended concentration and distilled water as control) and atrazine (the  
35 recommended concentration: 3.75 ml per 500 ml of water, 0.25-, 0.5-, 2.0- and 4-fold of the  
36 recommended concentration and distilled water as control) for 24 hours for the mortality test, and  
37 allowed to run for 15 seconds for the locomotion trial. All concentrations of both Vestamine<sup>®</sup> and  
38 Ultrazine<sup>®</sup> were highly toxic to worker termites and mortality increased as the concentration and  
39 time after treatment increased. For both herbicides, concentrations far less than the recommended  
40 rates caused 100% mortality. The distance travelled and speed of termites were significantly  
41 influenced by both Vestamine<sup>®</sup> and Ultrazine<sup>®</sup> as termites exposed to all tested concentrations of  
42 the herbicides exhibited reduced running speed and travelled shorter distances than the control.  
43 These findings suggest that beneficial insects, especially *M. bellicosus* may experience high  
44 mortality (up to 100%) and reduced mobility if they are sprayed upon or come in contact with  
45 plant materials that have been freshly sprayed with (less or more than) the recommended  
46 concentration of Vestamine<sup>®</sup> and Ultrazine<sup>®</sup>. The findings of our study calls for the reassessment  
47 of the usage of 2,4-D and atrazine based herbicides in weed control in termite populated habitats.

48



## 49 **Introduction**

50 Pesticides are ubiquitously considered the major driver of the loss of important beneficial insects.  
51 Only 10% of pesticides applied for pest control reaches the target organisms while the remaining  
52 bulk contaminates the environment where they adversely affect public health and beneficial  
53 organisms [1]. Globally, herbicides are the most widely used form of pesticides [3]. In tropical  
54 regions including Nigeria, intensive agricultural practices in order to increase yield has led to an  
55 increase in the use of agrochemicals such as herbicides [4]. Of a range of herbicides present in  
56 Nigeria, 2,4-Dichlorophenoxyacetic acid (2,4-D) and atrazine based herbicides rank among the  
57 most widely used selective weed control chemicals where locals in both rural and peri-urban  
58 communities rampantly use these chemical purposely for controlling weeds in farms and around  
59 their homes [5, O. Uyi, Pers. Obs.]. The locals opt for 2,4-D and atrazine based herbicides because  
60 these herbicides (i) kill most annual and perennial pre-emergent, emergent and post-emergent  
61 weeds and (ii) are cheaper and less laborious to use than the manual or mechanical weed control  
62 methods (O. Uyi, Pers. Obs.).

63  
64 2,4-D is a systemic herbicide and the first successful selective broadleaf plant herbicide, allowed  
65 for weed control in wheat, corn, and rice [6]. 2,4-D is a selective systemic herbicide that acts by  
66 mimicking the action of the plant growth hormone auxin, by stimulating growth, rejuvenating old  
67 cells and over stimulating young cells which results in uncontrolled growth and eventually death  
68 in susceptible plants due to its chemical resemblance to the auxin hormone [6] Atrazine is a  
69 selective chlorotriazine herbicide and the first triazine herbicide discovered by J.R. Geigy, Ltd., in  
70 Switzerland [7]. Atrazine is one of the mostly heavily used in herbicide in Sub-Saharan Africa, an  
71 area that is a major maize growing belt on the continent [8]. Atrazine is used on a variety of

72 terrestrial food crops, non-food crops, forests, residential turf, golf course turf, recreational areas,  
73 and rangeland [9] and for control of weeds in most farms in Nigeria [8].  atrazine works by  
74 inhibiting photosynthesis by blocking electron transfer at the reducing site (plastoquinone binding  
75 site) of photosynthesis complex II in the chloroplasts in higher plants [10, 11]. Although 2,4-D  
76 and atrazine based herbicides are among the most commonly used herbicides in many parts of the  
77 world (including Nigeria) due to its low cost, selectivity, efficacy and broad spectrum, their  
78 negative effects on beneficial and none target organisms are well documented in the literature [12-  
79 16].

80  
81 The environmental fate and effects of 2,4-D on different class of organisms and humans have  
82 benefited from recent reviews [17, 18]. 2,4-D based herbicides have been reported to be toxic to  
83 skin, eyes, respiratory and gastrointestinal tracts in humans [19] and its usage has been linked to  
84 endocrine and cell membranes disruptions, oxidative stress, reproduction toxicity, neurotoxicity,  
85 kidney and liver damage and toxicity in humans, fish and amphibians [17, 20, 21]. A wide range  
86 of toxic effects in earthworms and beneficial insects have been reported [22, 23]. The honey bee,  
87 *Apis mellifera* L. (Hymenoptera: Apidae) colonies fed 2,4-D experienced reduced brood  
88 production at a concentration of 100 ppm, and eggs failed to hatch when the colony was exposed  
89 to 1000 ppm [24]. Martinez et al. [25] correlated the population declines in three dung beetles with  
90 the use of a 2,4-D commercial formulation. Furthermore, commercial formulations of 2,4-D has  
91 been reported to be highly toxic, increase development time and decrease male population in larvae  
92 of lady beetle *Coleomegilla maculata* DeGeer (Coleoptera: Coccinellidae) [14].

93

94 Despite the plethora of controversies surrounding the toxicity of atrazine based herbicides on non-  
95 target organisms such as amphibians [26], they have been proven to have non-target effects on  
96 animals [15, 27]. For example, atrazine based herbicides are known to alter reproductive processes  
97 and development in insects, amphibians, fish, reptiles, birds, rodents and goats [15, 16, 28-30]  
98 Vogel et al. [15] reported that exposure to atrazine had significant effects on males of *Drosophila*  
99 *melanogaster* Meigen (Diptera: Drosophilidae) mating ability and the number of eggs his partner  
100 laid when he was successful at mating. Exposure to atrazine has also been shown to influence gene  
101 expression in *Chironomus tentans* Fabricus (Diptera: Chironomidae) [31] and physiology in  
102 odonates [32]. In addition, atrazine has been reported to affect diversity in aquatic insect  
103 communities [33]. At 2.5 mg atrazine/kg soil, equivalent to 2 kg/ha in the top 10 cm, field and  
104 laboratory studies demonstrated that mortality in arthropod collembolids, *Onchiurus apuanicus*  
105 was 47% in 60 days [9].

106  
107 Although many studies have raised questions about the toxicity of 2,4-D and atrazine based  
108 herbicides on beneficial and non-target insects such as bees, dung beetles and dragonflies, little or  
109 nothing is known about the effects of these herbicides on termite species, despite their ecological,  
110 nutritional and ethnopharmacological relevance. Termites (Blattodea) (also known as Blatteria)  
111 are undoubtedly key soil organisms in tropical and subtropical soils hence they are called  
112 ecosystem engineers (species that modulates the availability of resources for other organisms) or  
113 keystone species due to their abundance and impact on ecosystem functions in tropical and sub-  
114 tropical ecosystems [34-38]. Although mainly seen as pests of crops, trees and woods, only 185  
115 species of approximately 2800 described species, are proven pests [36].

116

117 Termites' species such as *Macrotermes* species have considerable influence on the physical,  
118 biological and chemical properties of the soil (regulation of soil structure, soil organic matter and  
119 nutrient cycling, soil aeration) and consequently water dynamics (improve absorption and storage  
120 of water in soil), carbon fluxes and storage, plant growth and overall biodiversity in tropical and  
121 subtropical ecosystems [36, 37]. In Africa, *Macrotermes* species are involved in many important  
122 ecological processes on savannah, bushlands, and rain forests, and plays a key role in influencing  
123 soil dynamics in the tropics [37]. For example, these species of termites act as herbivores and  
124 decomposers, feeding on a wide range of living, dead or decaying plant materials [36-39] as well  
125 as consumption and turnover of large volumes of soil rich in organic matter and fungi [39].  
126 *Macrotermes* species also recycles dung of primary consumers thereby influencing the functioning  
127 of tropical ecosystems [39]. *Macrotermes* species have also been reported to possess  
128 entomophagous, ethno-entomological, ethno-medicinal and cultural properties [40].

129  
130 The hypothesis that the rampant use of 2,4-D and atrazine based herbicides in Nigeria may pose a  
131 significant threat to the African mound building termite, *Macrotermes bellicosus* (Smeathman) has  
132 to our knowledge not been investigated. It is important to note that, in Nigeria, any possible effect  
133 on termites could be aggravated by the users, because many of the rural farmers and/or locals are  
134 not educated on the correct use of these herbicides and so seldom apply the correct concentration  
135 (O. Uyi, s. obs.). Beneficial insects such worker termites with a high degree of mobility and  
136 industry are likely to be caught in direct contact with herbicides at the time of application or  
137 immediately after application and may suffer consequences including death as has been  
138 documented in other beneficial insects [41, 42]. The goal of this study was to determine the effect  
139 of 2,4-D amine salt (Vestamine<sup>®</sup>) and atrazine (Ultrazine<sup>®</sup>) based herbicides in *Macrotermes*

140 *bellicosus* by evaluating the mortality and locomotor activity of worker termites after exposure to  
141 the recommended concentrations and levels below or above the recommended concentrations. It  
142 is important to investigate the effect of herbicides on termites because as ecosystem engineers,  
143 their roles in biological, chemical and physical processes in natural and semi-natural ecosystems  
144 are far too ecologically relevant to ignore.

145

## 146 **Materials and methods**

### 147 **Study organism**

148 Several aspects (population ecology, age structure, mound architecture, distribution, density and  
149 evolution) of the biology and ecology of *M. bellicosus* which are members of fungus growing sub  
150 family of Macrotermitinae and family Termitidae have been studied and documented [43-45]. In  
151 semi-arid African environments *Macrotermes* species are among the most dominant in terms of  
152 abundance and diversity [46]. *Macrotermes bellicosus* cultivate fungi of the genus *Termitomyces*  
153 (Termitomycetaceae: Tricholomataceae: Basidiomycota) on special structures within the nest called  
154 fungus combs and live in an obligate mutualistic symbiosis with the fungi [47]. They are mostly  
155 mound builders and are the largest termite species [34]. The principal food source of *M. bellicosus*  
156 consists of dead wood, grass litter, and dung [48]. Outside breaking down dead and decaying plant  
157 materials, *Macrotermes* species including *M. bellicosus* acts as ecosystem engineers by changing  
158 the surrounding environment and creating conditions different from adjacent soil through  
159 structuring and controlling to a large extent, the flows of energy and matter in the tropics and  
160 subtropics through allogenic engineering processes [34, 36, 37].

161

## 162 **Collection of termites**

163 *Macrotermes bellicosus* worker termites were collected from a termite mound in a field within the  
164 vicinity of Faculty of Life Sciences, University of Benin, Benin City, Nigeria. Since the  
165 establishment of the Faculty, mechanical control is and remains the only method of weed control  
166 on the property. Therefore, the termites have never been directly exposed to herbicides. The termite  
167 mound was dug up using a shovel and *M. bellicosus* were collected with a mix of soil and these  
168 (soil and termite) were placed in a plastic container (25 Litres) and taken to the laboratory of the  
169 Department of Animal and Environmental Biology and kept in a cool dark place until needed for  
170 the experiment (not more than 6 hours). When needed the termites were removed from the soil  
171 using a fine soft camel brush. Both mortality and locomotion performance tests were conducted in  
172 the laboratory of the Department of Animal and Environmental Biology, University of Benin,  
173 Benin City, Nigeria between May and August 2018.

## 175 **Herbicides**

176 Vestamine<sup>®</sup> (2,4-D amine salt) and Ultrazine<sup>®</sup> (Atrazine 80% wp) which are among the commonly  
177 used herbicides for controlling weeds in Benin City and other parts of Nigeria, were chosen for  
178 this study. The recommended concentrations of 2,4-D and atrazine based herbicides (2.5 litres per  
179 200 litres of water = 6.25 ml per 500 ml of water for 2,4-D and 120g per 16 litres of water = 3.75  
180 g per 500 ml of water for atrazine) were obtained and dissolved in 500 ml of water. The mixture  
181 was shaken thoroughly to ensure an even solution. Vestamine<sup>®</sup>, a commercially formulated 2,4-D  
182 containing 720 g/l w/v 2,4-D as the Amine Salt (600 g/l as extractable acid) (Nanjing CF  
183 Agrochemicals Co Ltd, Honghanyo, Luhe District, Nanjing, China) was used at the concentration  
184 recommended (6.25 ml per 500 ml of water) by the manufacturer and at 0.25- and 0.5-fold (1.563

185 ml per 500 ml of water, 3.125 ml per 500 ml of water, respectively) of the recommended  
186 concentration. Ultrazine<sup>®</sup>, a commercially formulated Atrazine containing 80% wp atrazine in  
187 powdered form (Zhejiang Zhongshan Chemical Industry Group Co., Ltd. Zhongshan, Zhejiang,  
188 China) was used at the concentration recommended (3.75 g per 500 ml of water) by the  
189 manufacturer and at 0.25-, 0.5-, 2- and 4-fold (0.938 g per 500 ml of water, 1.875 g per 500 ml of  
190 water, 7.5 g per 500 ml of water and 15 g ml per 500 ml of water) of the recommended  
191 concentration. Distilled water was used as the control. The higher concentrations of atrazine used  
192 in this study were similar to what locals and rural farmers commonly used in southern Nigeria (O.  
193 Uyi, Pers Obs.) due to little or no education on the use atrazine based herbicide. All tests were  
194 conducted using freshly prepared solutions in distilled water at  $25 \pm 2$  °C,  $65 \pm 10\%$  RH.

195

## 196 **Mortality bioassay**

197 Worker termites were sorted into groups of 5 and placed in small Petri-dishes (90-mm-diameter)  
198 lined with a disc of filter paper (Whatman No. 1) moistened with 0.6 ml of water. Fresh dilutions  
199 of test chemicals were mixed less than 1 hour before application. A 30 µl droplet of the test  
200 chemicals at different concentrations (1.563, 3.125, 6.25ml per 500 ml of water for Vestamine<sup>®</sup>  
201 and 0.938, 1.875, 3.75, 7.5 and 15.0 g per 500 ml of water for Ultrazine<sup>®</sup>) was app  dorsally to  
202 each insect. Since worker termites are the caste of termites which go out often to forage they are  
203 likely to come in direct contact with these herbicides at the time of, or post- application because  
204 of the frequency of usage by locals and farmers. A chemical-free control was set up whereby a 30  
205 µl droplet of distilled water was applied to each insect. Ten replicates of five insects were used for  
206 each of the herbicide treatment and control group. A total of 200 worker termites were used for  
207 Vestamine<sup>®</sup> (5 worker termites x 4 herbicide treatments x 10 replicates = 200) while a total of 300

208 worker termites were used for Ultrazine<sup>®</sup> (5 worker termites x 6 herbicide treatments x 10  
209 replicates = 300) based herbicide. All Petri dishes having termites (treated with the test herbicides  
210 or untreated) were kept in darkness by covering with a black plastic sheet to simulate the dark  
211 environment of the termite mounds at a temperature of  $25 \pm 2^{\circ}\text{C}$  and relative humidity of  $65 \pm$   
212 10%. Insect mortality was monitored every 12 hours for up to 24 hours after application of the  
213 herbicides. A worker termite was regarded as dead if it showed no signs of movement when  
214 touched lightly with a soft camel hair brush. Mortality was recorded and percentage mortality was  
215 calculated.

216

## 217 **Locomotion performance trial**

218 During spraying or application of atrazine or 2,4-D based herbicides by locals or farmers, foraging  
219 worker termites might be sprayed upon or come in contact with residues of these herbicides and  
220 this might have an effect on the locomotion ability of this species. *Macrotermes bellicosus* workers  
221 were obtained for the locomotion trials as described above on the day the trial was performed.  
222 After collection, the insects were placed in Petri dishes in preparation for the experiment. The  
223 effect of herbicides on termite's locomotor ability was determined by recording the speed of  
224 movement and distance covered in 30 seconds when treated with a range of concentrations of the  
225 test herbicides (1.563, 3.125, 6.25 ml per 500 ml of water for Vestamine<sup>®</sup> and 0.938, 1.875, 3.75,  
226 7.5 and 15 g per 500ml of water for Ultrazine<sup>®</sup>). Five termite workers were exposed individually  
227 to a particular concentration of the test chemicals by applying a 30  $\mu\text{l}$  droplet of the different  
228 herbicide treatments dorsally to the insect and kept in an open Petri dish for 2 minutes to  
229 acclimatize after which the insect was allowed to walk on a stage of 90 x 60 cm (ply board wrapped  
230 with a white cupboard paper) for 15 seconds. A pen  was used to trace the distance travelled by



231 the insect. Because the insect travelled in a zigzag manner after treatment with herbicides, a thread  
232 was used to measure the distance walked by the insect and the length of the thread was measured  
233 with a measuring tape and recorded. A total of 10 replicates were used for each concentration of  
234 the test herbicides. A total of 200 worker termites were used for Vestamine<sup>®</sup> (5 worker termites x  
235 4 herbicide treatments x 10 replicates = 200) while a total of 300 worker termites were used for  
236 Ultrazine<sup>®</sup> (5 worker termites x 6 herbicide treatments x 10 replicates = 300). The speed of  
237 individual termite was calculated by dividing the distance covered (in cm) by the total time the  
238 termite was exposed for (15 seconds).

239

## 240 **Statistical analysis**

241 Following arcsine square root transformation of the mortality data, the effects of different  
242 concentrations of herbicides (Vestamine<sup>®</sup> and Ultrazine<sup>®</sup>) and exposure time on mortality was  
243 analyzed using a Generalized Linear Model (GLZ) (assuming normal distribution with an identity  
244 link function). When the overall results were significant in the GLZ analysis, the difference among  
245 the treatments was compared using the sequential Bonferroni test. Probit regression was used to  
246 estimate the concentrations of both herbicides estimated to cause 50 and 90% mortality (LC<sub>50</sub> and  
247 LC<sub>90</sub>); the concentrations causing 50% and 90% of tested individuals to die in a given period (i.e.  
248 12 and 24 hours). The effect of herbicides on the distance and speed of *M. bellicosus* was evaluated  
249 using General Linear Model Analysis of Variance (GLM ANOVA). When the overall results were  
250 significant in the GLM ANOVA, the difference among the treatments was compared using  
251 Tukey's Honest Significant Difference (HSD) test. All analyses were performed using SPSS  
252 Statistical software, version 20.0 (IBM SPSS, Chicago, IL, USA).

253

## 254 **Results**

### 255 **Mortality bioassay**

256 Vestamine<sup>®</sup> (2, 4-D based herbicide) and Ultrazine<sup>®</sup> (atrazine based herbicide) caused varying and  
257 significant levels of mortality against *M. bellicosus* (Figs 1 and 2). Mortality caused by Vestamine<sup>®</sup>  
258 varied as a function of concentration (GLZ: Wald  $\chi^2_3 = 1266.00$ ; P = 0.0001) and exposure time  
259 (Wald  $\chi^2_1 = 81.50$ ; P= 0.0001) (Fig 1). The interaction between concentration and time also varied  
260 significantly (Wald  $\chi^2_3 = 77.50$ ; P = 0.0001). Higher mortality of worker termites were recorded  
261 at higher concentrations, which increased over time until 24 hours where 100% mortality occurred  
262 in the highest treatment (the recommended concentration). The recommended concentration  
263 caused 100% mortality in treated termites after 12 and 24 hour exposure. The 0.25- and 0.5-fold  
264 below the recommended concentration of Vestamine<sup>®</sup> caused 44 to 72% mortality and 88 to 96%  
265 mortality after 12 and 24 hours, respectively (Fig 1). Percentage mortality caused by Ultrazine<sup>®</sup>  
266 was influenced by concentrations (Wald  $\chi^2_3 = 846.67$ ; P = 0.0001), but not exposure time (Wald  
267  $\chi^2_1 = 7.333$ ; P = 0.067) and their interactions (Wald  $\chi^2_5 = 4.67$ ; P = 0.458) (Fig 2). The  
268 recommended concentration respectively caused 92 and 100% mortality in treated termites after  
269 12 and 24 hour exposure. The 0.25-, 0.5-, 2-, and 4-fold below the recommended concentration of  
270 atrazine caused 80 to 100% mortality and 96 to 100% mortality after 12 and 24 hours, respectively  
271 (Fig 2). Concentrations of Vestamine<sup>®</sup> and Ultrazine<sup>®</sup> estimated to cause 50% (LC<sub>50</sub>) and 90%  
272 (LC<sub>90</sub>) in termites were calculated based on the mortality results (Table 1). LC<sub>50</sub> and LC<sub>90</sub>  
273 decreased with increased exposure time for both herbicides. Following 24-hour exposure to  
274 Vestamine<sup>®</sup>, LC<sub>50</sub> and LC<sub>90</sub> were 1.028 and 2.031 ml per 500 ml of water. The calculated LC<sub>50</sub> and  
275 LC<sub>90</sub> for Ultrazine<sup>®</sup> were 0.212 and 1.348 ml per 500 ml of water.

276

277 **Fig 1. Percentage mean ( $\pm$ se) mortality of *Macrotermes bellicosus* following exposure to**  
278 **different concentrations of Vestamine® for 12 and 24 hours. Means capped with different**  
279 **letters are significantly different (sequential Bonferroni test,  $P < 0.05$ ).**

280

281 **Fig 2. Percentage mean ( $\pm$ se) mortality of *Macrotermes bellicosus* following exposure to**  
282 **different concentrations of Ultrazine® for 12 and 24 hours. Means capped with same letters are**  
283 **not significantly different (sequential Bonferroni test,  $P > 0.05$ ).**

284

285 **Table 1: Index of toxicity (LC<sub>50</sub> and LC<sub>90</sub>) of *Macrotermes bellicosus* when to different**  
286 **concentrations of Vestamine® and Ultrazine® for 12 and 24 hours.**

| Herbicide<br>(ml) | Exposure time<br>(hours) | Index of toxicity     |                       | 95% confidence interval |                       |
|-------------------|--------------------------|-----------------------|-----------------------|-------------------------|-----------------------|
|                   |                          | LC <sub>50</sub> (ml) | LC <sub>90</sub> (ml) | LC <sub>50</sub> (ml)   | LC <sub>90</sub> (ml) |
| Vestamine®        | 12                       | 2.091                 | 3.911                 | 1.512-3.144             | 2.782-5.432           |
|                   | 24                       | 1.028                 | 2.031                 | 0.778-1.468             | 1.532-4.742           |
| Ultrazine®        | 12                       | 0.571                 | 2.515                 | 0.282-0.763             | 2.941-4.111           |
|                   | 24                       | 0.212                 | 1.348                 | 0.183-0.279             | 1.022-2.583           |

287

288

## 289 **Locomotion performance**

290 Locomotion performance of *M. bellicosus* varied as a function of herbicide concentrations. Overall  
291 locomotor performance reduced with increase in concentration irrespective of herbicide tested.  
292 The distance covered by termites varied significantly ( $F_{3,39} = 137.41$ ;  $P = 0.0001$ ) with the control  
293 termites travelling the longest distance (53.4 cm) compared to their Vestamine® treated

294 counterparts that travelled less covering short distances (1.563 ml = 47.4 cm, 3.125 ml = 43.8 cm,  
295 6.250 ml = 33.0 cm) (Fig 3A). Similarly, the running speed of termites also varied significantly  
296 ( $F_{3,39} = 137.41$ ;  $P = 0.0001$ ) with termites treated with water (control treatment) having the highest  
297 speed (3.56 cm/s) compared to those that were treated with different concentrations of Vestamine<sup>®</sup>  
298 (Fig 3B). The distance covered by termites exposed to Ultrazine<sup>®</sup> differed ( $F_{5, 59} = 81.65$ ;  $P =$   
299 0.0001) according to herbicide concentrations with termites exposed to the highest concentration  
300 (15.0 ml / 500 ml of water) travelling the least distance (14.40 cm) compared to the control  
301 treatment that covered the greatest distance (57.20 cm) (Fig 4A). Finally, the running speed of  
302 termites exposed to Ultrazine<sup>®</sup> also differed ( $F_{5,59} = 81.65$ ;  $P = 0.0001$ ) with workers exposed to  
303 the recommended concentration running significantly slower (1.88 cm/s) compared with the  
304 control (treated with water) group that had the fastest speed (3.81 cm/s) (Fig 4A).

305

306 **Fig 3. Mean ( $\pm$ se) distance travelled by (a), and running speed of (b) *Macrotermes bellicosus***  
307 **after exposure to different concentrations of Vestamine<sup>®</sup>.** Means capped with different letters  
308 are significantly different [Tukey's Honest Significant Difference (HSD) test:  $P < 0.05$ ].

309

310 **Fig 4. Mean ( $\pm$ se) distance travelled by (a), and running speed of (b) *Macrotermes bellicosus***  
311 **after exposure to different concentrations of Ultrazine<sup>®</sup>.** Means capped with different letters  
312 are significantly different [Tukey's Honest Significant Difference (HSD) test:  $P < 0.05$ ].

313

## 314 **Discussion**

315 The increasing use of herbicides in natural and semi natural ecosystems (e.g. agroecosystems) over  
316 the past years have led to some deleterious effects on some biotic components of the ecosystem

317 including non-target and beneficial organisms and even human health [18, 49]. Until recently, the  
318 adverse effects of herbicides on non-target or beneficial organisms have not received much  
319 attention in Nigeria [5] and toxicological studies of herbicides on termites are still scarce or non-  
320 existent. In this study, the recommended concentrations (by manufacturers) of 2,4-D amine salt  
321 (Vestamine<sup>®</sup>) and atrazine (Ultrazine<sup>®</sup>) based herbicides and values below and above the  
322 recommended concentrations were applied on termites. The results of this study demonstrates that  
323 the recommended concentrations of Vestamine<sup>®</sup> and Ultrazine<sup>®</sup> caused high mortality (100% after  
324 24 hours exposure) and impaired locomotion ability in workers of the African mound building  
325 termite, *Macrotermes bellicosus*.

326  
327 Exposure to Vestamine<sup>®</sup> (2, 4-D based herbicide) caused significant mortality in termites but this  
328 was dependent on exposure duration and concentrations tested. Concentrations of Vestamine<sup>®</sup>  
329 estimated to cause 50% and 90% mortality (LC<sub>50</sub> and LC<sub>90</sub>) were generally higher after 12-hour  
330 exposure than 24-hour exposure implying that toxicity increased with time. LC<sub>50</sub> and LC<sub>90</sub> were  
331 also higher after 12-hour exposure than 24-hour exposure to Ultrazine<sup>®</sup>. Based on the LC<sub>50</sub> values  
332 and the recommended concentration for use, Vestamine<sup>®</sup> and Ultrazine<sup>®</sup> were highly toxic to  
333 termites as the LC<sub>50</sub> and LC<sub>90</sub> fell below the recommended dosage range at both 12 and 24 hours.  
334 This study showed that the manufacturer's recommended concentration of Vestamine<sup>®</sup> and  
335 Ultrazine<sup>®</sup> caused 100% mortality in worker termites at 24 hours after treatment. While a few  
336 authors have reported the safety of 2, 4-D based herbicides on beneficial insects [50], studies  
337 reporting the toxicity of 2, 4-D based herbicides are not uncommon. For example Hill et al. [51]  
338 reported that the recommended concentration of 2,4-D caused up to 80% mortality in the mirid,  
339 *Ecritotarsus catarinensis* (Carvalho) (Hemiptera: Miridae) after the insect was exposed for 72

340 hours. In addition, Freydier and Lundgren [14] reported 80% mortality in ladybug *Coleomegilla*  
341 *maculata* De Geer (Coleoptera: Coccinellidae) larvae due to exposure to 2,4-D. Futhermore, [52],  
342 reported four times mortality in three species of coccinellid beetle larvae *Coccinella*  
343 *transversoguttata* (Fald.), *Hippodamia tredecimpunctata* (L.) and *Coccinella perplexa* (Muls.) in  
344 six different age groups sprayed with 2,4-D compared to the control (water). In our study, the  
345 highest mortality was recorded at the highest concentrations and longest exposure duration,  
346 suggesting time and dose-dependent survival and concentration graded lethality. In contrast  
347 mortality caused by Ultrazine<sup>®</sup> was high irrespective concentration and exposure time, which may  
348 be due to the high toxicity of atrazine based herbicides as has been previously reported [53]. The  
349 authors reported significant reduction in adult lifespan of agrobiont wolf spider *Pardosa milvina*  
350 on exposure to atrazine based herbicide.

351

352 Previous studies and reviews have reported mortality on exposure to either atrazine or 2,4-D based  
353 herbicides (either directly or indirectly by causing life threatening impacts) in humans [24-56].  
354 Atrazine and 2,4-D have been shown to increase insecticide toxicity in southern armyworm  
355 *Spodoptera eridania* (Stoll) (Lepidoptera: Noctuidae) [57] The high percentage mortality caused  
356 by the recommended concentrations of Vestamine<sup>®</sup> and Ultrazine<sup>®</sup> in worker termites recorded in  
357 this study suggests that exposure to these chemicals might lead to a reduced work force which may  
358 result in a reduction or loss of their ecosystem engineering functions and starvation of the colony  
359 as other castes depend on the food and water brought back by foraging workers. It is not impossible  
360 that termites that take up herbicides or survive exposure and are able to make their way back to  
361 the colony may take some of the residues of these herbicides back and this may lead to a buildup  
362 of pesticide toxicity in the mound. For example, atrazine residues have been found in nearly 14%

363 of North American bee colonies including brood combs where bees lay eggs and larvae develop  
364 [58] and has been found in high concentrations in honeybee colonies that were either sick or  
365 dead[59]. This study therefore showed that intentional use or accidental release of these herbicides  
366 in termites' habitats could threaten the population of *M. Bellicosus* workers and could therefore  
367 negatively impact the ecosystem services provided by these species and possibly other  
368 *Macrotermes* species.

369  
370 The effect of exposure to pesticides on locomotion of beneficial arthropods is often indirectly  
371 studied [60]. In this study, the recommended concentration of 2, 4-D based herbicide (=Vestamine)  
372 reduced the running speed and distance travelled by 38% in treated worker termites compared to  
373 the control treatment (water). Similarly, the recommended concentration of atrazine based  
374 herbicide (=Ultrazine<sup>®</sup>) reduced the running speed and distance travelled by 51% in treated worker  
375 termites compared to the control treatment (water). The reduced mobility (reduced running speed  
376 and distance covered) in worker termites might be due to direct intoxication resulting in knock-  
377 down effect, trembling and tumbling or rotating [60]. Exposure to low concentrations of the  
378 herbicides resulted in an increased mobility of worker termites and conversely exposure to higher  
379 concentrations reduced movement (distance travelled and running speed). The reduced mobility  
380 in the worker termites may limit the ability of this caste to transport food to the colony and perform  
381 numerous ecological functions. Also, the reduced mobility in worker termites may increase their  
382 vulnerability to predation and harsh environmental conditions as has been reported in other insects  
383 [61]. Although studies on the effect of 2,4-D and atrazine based herbicides on the locomotion  
384 performance in insects are still scarce, there are few available literatures on glyphosate and bees,  
385 with contrasting results [61.63]. For example Herbert *et al* [62] reported no effect on the

386 locomotive ability of forager honey bees, *Apis mellifera* L. (Hymenoptera: Apidae) when foragers  
387 collected sucrose contaminated with glyphosate at an artificial feeder but Balbuena et al. [63]  
388 reported that exposure to glyphosate had effect on honeybee navigation. In other taxa,  
389 organochlorine herbicides (endosulfan and chlordane) have been reported to decrease swim speed  
390 and activity levels in both fish and amphibians [64]. Rao *et al.* [65] also reported reduced distance  
391 travelled per unit time and swim speed with respect to the length of exposure in mosquito fish  
392 *Gambusia affinis* exposed to the organophosphate insecticide monocrotophos, Dimethyl (E)-1-  
393 methyl-2-(methyl-carbamoyl) vinyl phosphate (MCP).

394

395 Beyond the fact that the recommended concentrations of both Vestamine<sup>®</sup> (2, 4-D based herbicide)  
396 and Ultrazine<sup>®</sup> (atrazine based herbicide) resulted in 100% mortality and significantly reduced  
397 mobility in worker termite. One of the interesting findings of the study was that concentrations of  
398 both herbicides far below the recommended rates caused 100% mortality in the studied species,  
399 suggesting that even the littlest exposure of termites to these chemicals can reduce the population  
400 of worker termites. Our findings therefore reinforce the warning that herbicides, although  
401 important for agriculture, needs to be used more cautiously, applied only in the indicated amounts  
402 and, as far as possible, replaced by other methods that are less harmful to the environment and  
403 biodiversity. Understanding the mechanism of toxicity is key to fully elucidate a toxicant's  
404 potential impacts and should be the focus of future studies. Furthermore, experimental studies in  
405 the field are rare, and most of the studies we cited here were conducted in the laboratory. Future  
406 comparative field and laboratory research should be prioritized as this will elucidate the  
407 complexity in behavioral responses of animals to herbicides. Future studies should aim to provide  
408 more ecological relevance to these findings by investigating the effect of herbicides on related



409 behavioural measures such as termite navigation. In <sup>51</sup> sum, we presented data for the first time to  
410 show that 2,4-D and atrazine based herbicides are highly toxic and are capable of causing high  
411 mortality and reduced mobility in workers of the African mound termite, *M. bellicosus* and can  
412 negatively affect the ecosystem services provided by these species which may compromise the  
413 integrity of the ecosystem. Therefore, these herbicides should be used by skilled personnel and it  
414 is recommended locals and farmers should be educated on the proper use of 2,4-D and atrazine  
415 based herbicides because of their lethal and sub-lethal effects.

416

417

418

419

420

421

422

423

424

425

426

427

428

429

430

431

432 **Acknowledgements**

433 We thank two anonymous for their constructive comments on early drafts and Mr. Joshua Mfom

434 Friday for assistance with collecting the termites used for this study.

435

436

437

438

439

440

441

442

443

444

445

446

447

448

449

450

451

452

## 453 **References**

- 454 1. Pimentel D. Amounts of pesticides reaching target pests: environmental impacts and ethics.  
455 *Journal of Agricultural and Environmental Ethics*. 1995; 8: 17-29.
- 456 2. Hussain S, Siddique T, Saleem M, Arshad M, Khalid A. Impact of pesticides on soil  
457 microbial diversity, enzymes, and biochemical reactions. *Advances in Agronomy*. 2009;  
458 102: 159-200.
- 459 3. Freemark K, Boutin C. Impact of agricultural herbicide use on terrestrial wildlife in  
460 temperate landscapes: A review with special reference to North America. *Agriculture,  
461 Ecosystems and Environment*. 1995; 52: 67-91.
- 462 4. Gianessi LP. The increasing importance of herbicides in worldwide crop production. *Pest  
463 Management Science*. 2013; 69: 1099-1105.
- 464 5. Oluwole O, Cheke RA. Health and environmental impacts of pesticide use practices: a case  
465 study of farmers in Ekiti State, Nigeria. *International Journal of Agricultural Sustainability*.  
466 2009; 7: 153-163
- 467 6. Song Y. Insight into the mode of action of 2,4-dichlorophenoxyacetic acid (2,4-D) as an  
468 herbicide. *Journal of Integrative Plant Biology*. 2014; 56: 106-113.
- 469 7. LeBaron HM, Burnside OC, McFarland J. The triazine herbicides: A milestone in the  
470 development of weed control technology  LeBaron HM, McFarland J, Burnside OC,  
471 editors. *The triazine herbicides 50 years revolutionizing agriculture*. Amsterdam: Elsevier  
472 Science; 2008. pp. 1-12.
- 473 8. Chikoye D, Udensi UE, Fontem Lum A. Performance of a new formulation of atrazine for  
474 weed control in maize in Nigeria. *Journal of Food, Agriculture and Environment*. 2005; 4:  
475 114-117.

- 476 9. Eisler R. Atrazine hazards to fish, wildlife, and invertebrates: a synoptic review. Laurel:  
477 US Department of Interior, Fish and Wildlife Services; 1989.
- 478 10. Shimabukuro RH, Swanson HR. Atrazine Metabolism, Selectivity, and Mode of Action.  
479 Journal of Agriculture, Food and Chemistry. 1969; 17: 199-205.
- 480 11. Solomon KR, Baker DB, Richards RP, Dixon KR, Klaine SJ, La Point TW et al. Ecological  
481 risk assessment of atrazine in North American surface waters. Environmental Toxicology  
482 and Chemistry. 1996; 15: 31-76.
- 483 12. Ainsworth N. Integration of herbicides with arthropod biocontrol agents for weed control  
484 Biocontrol Science and Technology. 2003; 13: 547-570.
- 485 13. Relyea RA. The impact of insecticides and herbicides on the biodiversity and productivity  
486 of aquatic communities. Ecological Applications. 2005; 15: 618-627.
- 487 14. Freydier L, Lundgren JG. Unintended effects of the herbicides 2,4-D and dicamba on lady  
488 beetles. Ecotoxicology. 2016; 25: 1270-1277.
- 489 15. Vogel A, Jocque H, Sirot LK, Fiumera AC. Effects of atrazine exposure on male  
490 reproductive performance in *Drosophila melanogaster*. Journal of Insect Physiology.  
491 2015; 72:14-21.
- 492 16. Reis TC, Soares MA, Dos Santos JB, Dos Santos CA, Serrão JE, Zanuncio JC, et al.  
493 Atrazine and nicosulfuron affect the reproductive fitness of the predator *Podisus*  
494 *Nigrispinus* (Hemiptera: Pentatomidae). Anais Da Academia Brasileira De Ciências. 2018;  
495 90: 3625-3633
- 496 17. De Castro Marcato AC, de Souza CP, Fontanetti CS. Herbicide 2,4-D: A review of Toxicity  
497 on non-target organisms. Water Air Soil Pollution. 2017; 228:120

- 498 18. Islam F, Wang J, Farooq MA, Khan MSS, Xu L, Zhu J, et al. Potential impact of the  
499 herbicide 2,4-dichlorophenoxyacetic acid on human and ecosystems. *Environment*  
500 *International*. 2018; 111: 332-351.
- 501 19. Ellenhorn MJ, Schonwald S, Ordog G, Wasserberger J. *Ellenhorn's Medical toxicology:*  
502 *diagnosis and treatment of human poisoning*. 2<sup>nd</sup> ed. Baltimore: Williams and Wilkins;  
503 1997.
- 504 20. Colborn T, Vom Saal FS, Soto AM. Developmental effects of endocrine disrupting  
505 chemicals in wildlife and humans. *Environmental Health Perspectives*. 1993; 101: 378-  
506 384.
- 507 21. Aronzon CM, Sandoval MT, Herkovits J, Pérez-Coll CS. Stage-dependent toxicity of 2,4-  
508 dichlorophenoxyacetic on the embryonic development of a South American toad, *Rhinella*  
509 *arenarum*. *Environmental Toxicology*. 2011; 26: 373-381.
- 510 22. Correia FV, Moreira JC. Effects of glyphosate and 2,4-D on earthworms (*Eisenia foetida*)  
511 in laboratory tests. *Bulletin of Environmental Contamination and Toxicology*. 2010;  
512 85:264-268.
- 513 23. Park K, Park J, Kim J, Kwak IS. Biological and molecular responses of *Chironomus*  
514 *riparius* (Diptera, Chironomidae) to herbicide 2,4-D (2,4-dichlorophenoxyacetic acid).  
515 *Comparative Biochemistry and Physiology Part C*. 2010; 151: 439-446.
- 516 24. Morton HL, Moffett JO, MacDonald RH. Toxicity of herbicides to newly emerged honey  
517 bees. *Environmental Entomology*. 1972; 1: 102-104.
- 518 25. Martinez IM, Lumaret J-P, Cruz MR. Suspected side effects of a herbicide on dung beetle  
519 populations (Coleoptera: Scarabaeidae). *Comptes Rendus de l'Académie des Sciences III*  
520 2001; 324: 989-994.

- 521 26. Rohr JR.. Atrazine and Amphibians: A story of profits, controversy, and animus. The  
522 Encyclopedia of the Anthropocene. 2018; 5: 141-148.
- 523 27. Asouzu Johnson A, Ihunwo, A., Chimuka, L. and Mbajiorgu, F. Cardiotoxicity in African  
524 clawed frog (*Xenopus laevis*) sub-chronically exposed to environmentally relevant atrazine  
525 concentrations: implications for species survival. Aquatic Toxicology. 2019; 213:105218.  
526 28. Cooper RL, Laws SC, Das PC, Narotsky MG, Goldman JM, Tyrey EL, Stoker TE. Atrazine  
527 and reproductive function: mode and mechanism of action studies. Birth Defects Research  
528 (Part B). 2007; 80: 98-112.
- 529 29. Gely-Pernot A, Hao C, Becker E, Stuparevic I, Kervarrec C, Chalmel F, Primig M, Jégou  
530 B, Smagulova F. The epigenetic processes of meiosis in male mice are broadly affected by  
531 the widely used herbicide atrazine BMC Genomics. 2015; 16:885.
- 532 30. Leite GLD, Daiana de Paulo P, Zanuncio JC, Alvarenga AC, Soares MA, Tavares WS,  
533 Tuffi-Santos LD, Spínola-Filho PRC. Effects of atrazine-based herbicide on emergence  
534 and sex ratio of Trichogrammatidae (Hymenoptera). Florida Entomologist. 2015; 98: 899-  
535 902.
- 536 31. Londono DK, Siegfried BD, Lydy MJ 2004. Atrazine induction of a family 4 cytochrome  
537 P450 gene in *Chironomus tentans* (Diptera: Chironomidae). Chemosphere. 2004; 56: 701-  
538 706.
- 539 32. Campero M, Slos S, Ollevier F, Stoks R. Sublethal pesticide concentrations and predation  
540 jointly shape life history: behavioral and physiological mechanisms. Ecological  
541 Applications. 2007; 17: 2111-2122.
- 542 33. Dewey SL. Effects of the herbicide atrazine on aquatic insect community structure and  
543 emergence. Ecology. 1986; 67: 148-162.

- 544 34. Dangerfield JM, Mccarthy TS, Ellery WN. The mound-building termite *Macrotermes*  
545 *richalensis* as an ecosystem engineer. *Journal of Tropical Ecology*. 1998; 14: 507-520.
- 546 35. Jouquet P, Dauber J, Lagerlof J, Lavelle P, Lepage M. Soil invertebrates as ecosystem  
547 engineers: Intended and accidental effects on soil and feedback loops. *Applied Soil*  
548 *Ecology*. 2006; 32: 153-164.
- 549 36. Jouquet P, Traoré S, Choosai C, Hartmann C, Bignell D. Influence of termites on  
550 ecosystem functioning. *Ecosystem services provided by termites*. *European Journal of Soil*  
551 *Biology*. 2011; 47: 215-222.
- 552 37. Jouquet P, Bottinelli N, Shanbhag RR, Bourguignon T, Traoré S, Abbasi SA. Termites:  
553 The neglected soil engineers of tropical soils. *Soil Science*. 2016; 181: 157-165.
- 554 38. Khan MA, Ahmad W, Paul B. Ecological impacts of termites In: Khan MA, Ahmad W,  
555 editors. *Termites and sustainable management, sustainability in plant and crop protection*.  
556 New York: Springer Publishing. 2018; pp 201-216
- 557 39. Freymann BP, Buitenwerf R, Desouza O, Olf H. The importance of termites (Isoptera) for  
558 the recycling of herbivore dung in tropical ecosystems: a review. *European Journal of*  
559 *Entomology*. 2008; 105: 165–173.
- 560 40. van Huis A. Cultural significance of termites in sub-Saharan Africa. *Journal of*  
561 *Ethnobiology and Ethnomedicine*. 2017; 13:8
- 562 41. Egan JF, Bohnenblust E, Goslee S, Mortensen D, Tooker J. Herbicide drift can affect plant  
563 and arthropod communities. *Agriculture, Ecosystems and Environment*. 2014; 185: 77-87.
- 564 42. Sanchez-Bayo F, Goka K. Pesticide residues and bees – a risk assessment. *PLoS ONE*,  
565 2014; 9(4): e94482.

- 566 43. Collins NM. Populations, age structure and survivorship o colonies of *Macrotermes*  
567 *bellicosus* (Isoptera: Macrotermitinae). Journal of Animal Ecology. 1981; 50: 293-311.
- 568 44. Lepage M. 1984. Distribution, density and evolution of *Macrotermes* nests (Isoptera:  
569 Macrotermitinae) in the north-east of Ivory Coast. Journal of Ecology. 1984; 53: 107-117.
- 570 45. Korb J, Linsenmair, KE. The effects of temperature on the architecture and distribution of  
571 *Macrotermes bellicosus* (Isoptera, Macrotermitinae) mounds in different habitats of a West  
572 African Guinea Savanna. Insectes sociaux. 1998; 45: 51-65.
- 573 46. Turner JS. Termites as mediators of the water economy of arid savanna ecosystems In:  
574 D'Odorico P, Porporato A, editors. Dryland ecohydrology. Amsterdam: Springer  
575 Publishing; 2006. pp. 303-313.
- 576 47. De Fine Licht HH, Andersen A, Aanen DK. *Termitomyces* sp. associated with the termite  
577 *Macrotermes natalensis* has a heterothallic mating system and multinucleate cells.  
578 Mycological Research. 2004; 109: 314-318.
- 579 48. Dangerfield JM, Schuurman G. Foraging by fungus-growing termites (Isoptera:  
580 Termitidae, Macrotermitinae) in the Okavango Delta, Botswana. Journal of Tropical  
581 Ecology. 2000; 16: 717-731.
- 582 49. Meyer MI, Scribner EA. Evolution of analytical technology and its impact on water-  
583 quality studies for selected herbicides and their degradation products in water In: Ahuja,  
584 S. Handbook of Water Purity and Quality. Amsterdam: Academic Press; 2009. pp. 289-  
585 313.
- 586 50. Carmo EL, Bueno AF, Bueno R.COF. Pesticide selectivity for the insect egg parasitoid  
587 *Telenomus remus*. BioControl. 2010; 55: 455-464.



- 588 51. Hill MP, Coetzee JA, Ueckermann C. Toxic effects of herbicides used for water hyacinth  
589 control on to insects released for its biological control in South Africa. *Biocontrol Science*  
590 and *Technology*. 2012; 22: 1321-1333.
- 591 52. Adams JB. Effects of spraying 2,4-D amine on Coccinellid larvae. *Canadian Journal of*  
592 *Zoology*. 1960; 38: 285-288.
- 593 53. Godfrey JA, Rypstra AL. Impact of an atrazine-based herbicide on an agrobiont wolf  
594 spider. *Chemosphere*. 2018; 201: 459-465
- 595 54. Ibrahim MA, Bond GG, Burke TA, Cole P, Dost FN, Enterline PE, Gough M, Greenberg  
596 RS, Halperin WE, McConnell E, Munro IC, Swenberg JA, Zahm SH, Graham JD. Weight  
597 of the Evidence on the Human Carcinogenicity of 2,4-D *Environmental Health*  
598 *Perspectives*. 1999; 96: 213-222.
- 599 55. Burns CJ, Beard KK, Cartmill JB. Mortality in chemical workers potentially exposed to  
600 2,4-dichlorophenoxyacetic acid (2,4-D) 1945–94: an update. *Occupation and*  
601 *Environmental Medicine*. 2001; 58: 24-30
- 602 56. Cox C. Herbicide factsheet: atrazine toxicology. *Journal of Pesticide Reform*. 2001; 21(2):  
603 12-20.
- 604 57. Kao LM, Wilkinsonb CF, Brattstenc LB. In-Vivo Effects of 2,4-D and atrazine on  
605 Cytochrome P-450 and insecticide toxicity in southern Armyworm (*Spodoptera eridania*)  
606 Larvae. *Pesticide Science*. 1995; 45: 331-334.
- 607 58. Mullin CA, Frazier M, Frazier JL, Ashcraft S, Simonds R, van Engelsdorp D, Pettis JS  
608 (2010). High levels of miticides and agrochemicals in North American apiaries:  
609 Implications for honey bee health. *PLoS ONE*. 2010; 5(3): e9754

- 610 59. Krupke CH, Hunt GJ, Eitzer BD, Andino G, Given K. Multiple Routes of Pesticide  
611 Exposure for Honey Bees Living Near Agricultural Fields. PLoS ONE. 2012; 7(1): e29268.
- 612 60. Desneux D, Decourtye A, Delpuech J-M. The sublethal effects of pesticides on beneficial  
613 arthropods. Annual Review of Entomology. 2007; 52: 81-106.
- 614 61. Kunkel BA, Held DW, Potter DA. Lethal and sublethal effects of bendiocarb, halofenozide,  
615 and imidacloprid on *Harpalus pennsylvanicus* (Coleoptera: Carabidae) following different  
616 modes of exposure in turfgrass. Journal of Economic Entomology. 2001; 94: 60-67.
- 617 62. Herbert LT, Vázquez DE, Andrés A, Farina WM. Effects of field-realistic doses of  
618 glyphosate on honeybee appetitive behaviour. Journal of Experimental Biology. 2014; 217:  
619 3457-3464.
- 620 63. Balbuena MS, Tison L, Hahn M-L, Greggers U, Menzel R, Farina WM. Effects of sublethal  
621 doses of glyphosate on honeybee navigation. The Journal of Experimental Biology. 2015;  
622 218: 2799-2805.
- 623 64. Shuman-Goodier ME, Propper CR. A meta-analysis synthesizing the effects of pesticides  
624 on swim speed and activity of aquatic vertebrates. Science of the Total Environment. 2016;  
625 565: 758-766.
- 626 65. Rao JV, Begum G, Jakka NM, Srikanth K, Rao RN. Sublethal effects of profenofos on  
627 locomotor behavior and gill architecture of the mosquito fish, *Gambusia affinis*. Drug and  
628 Chemical Toxicology. 2006; 29: 255-267.

629  
630  
631  
632  
633  
634

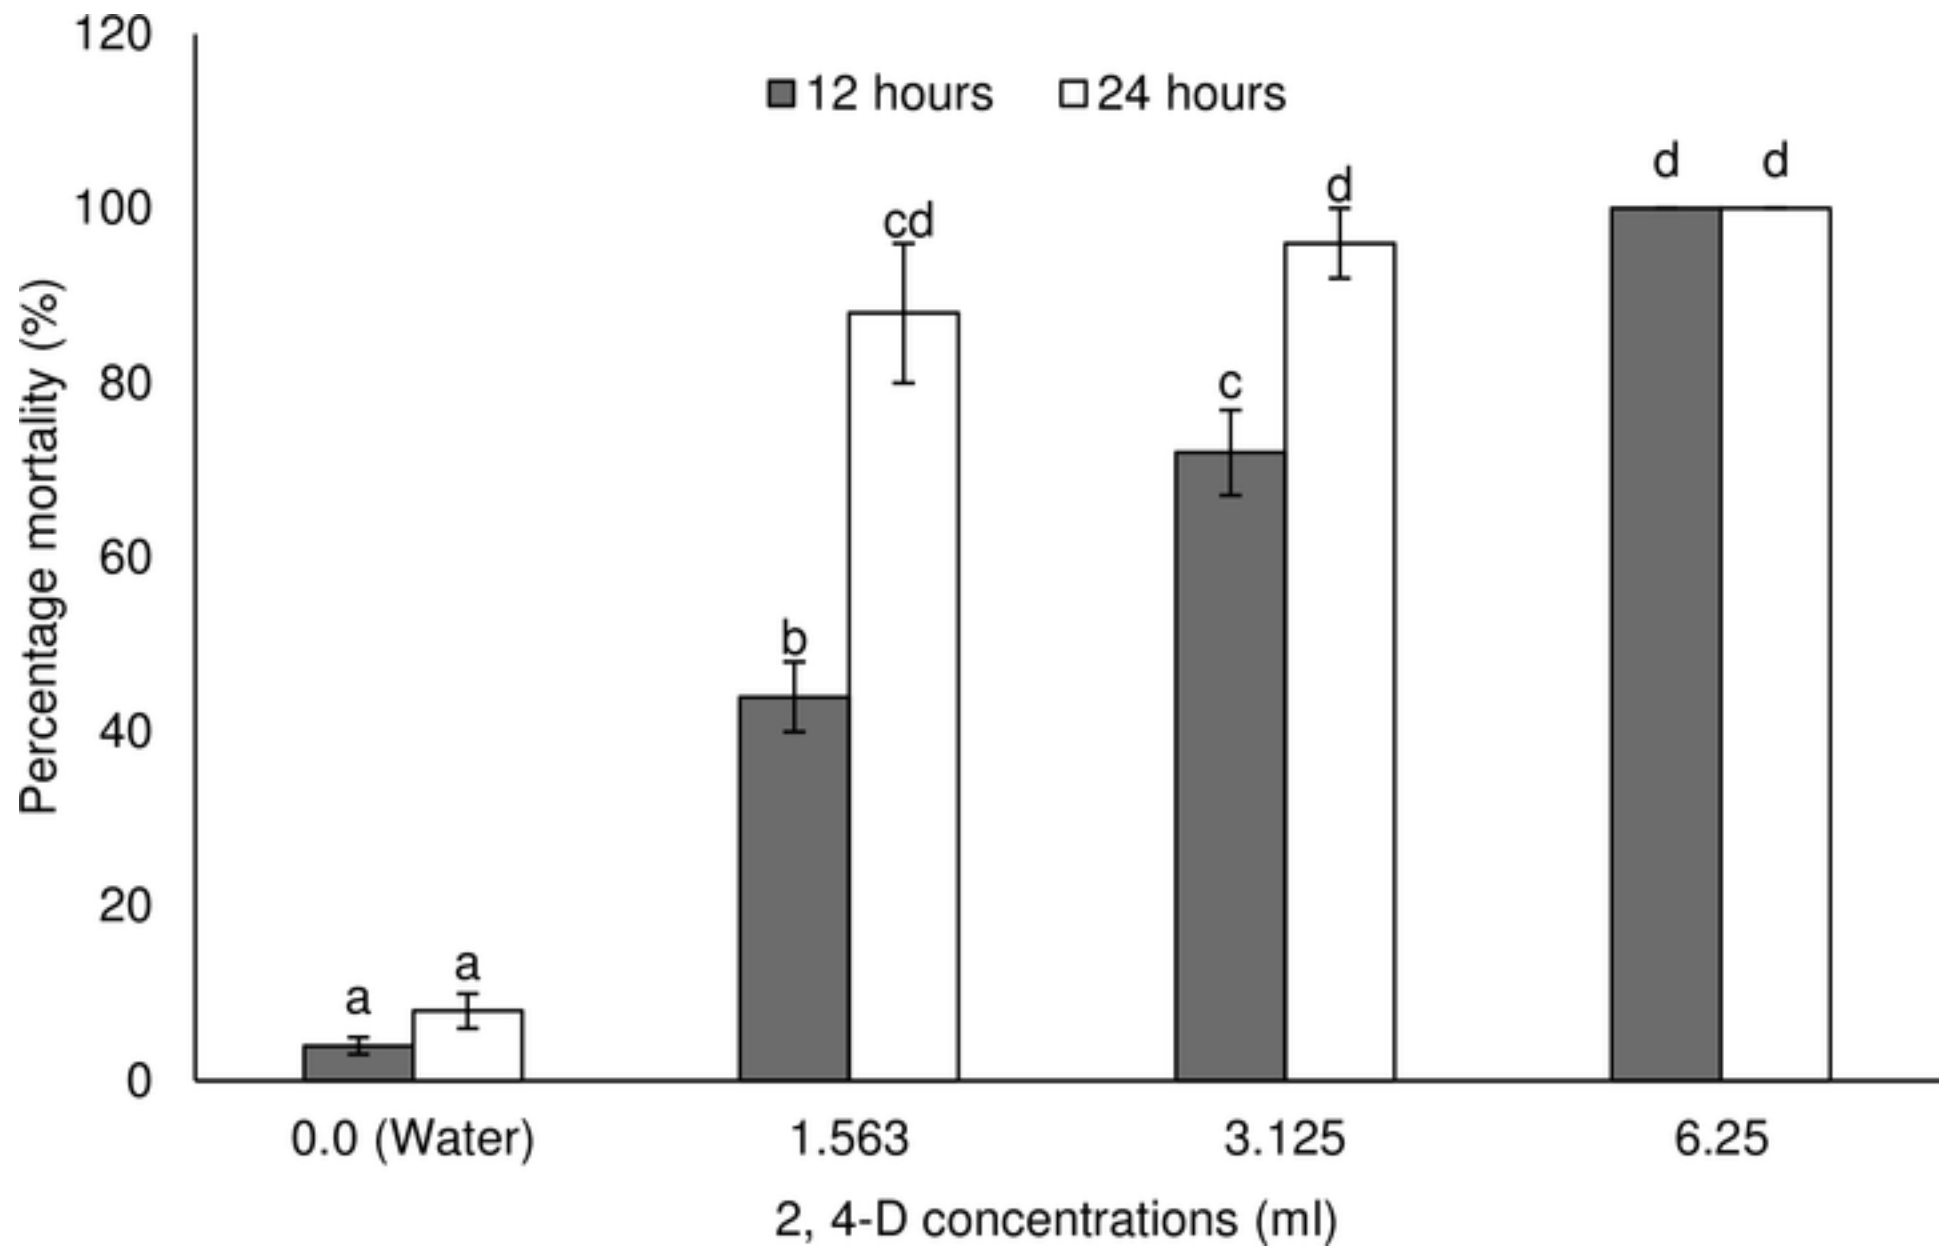

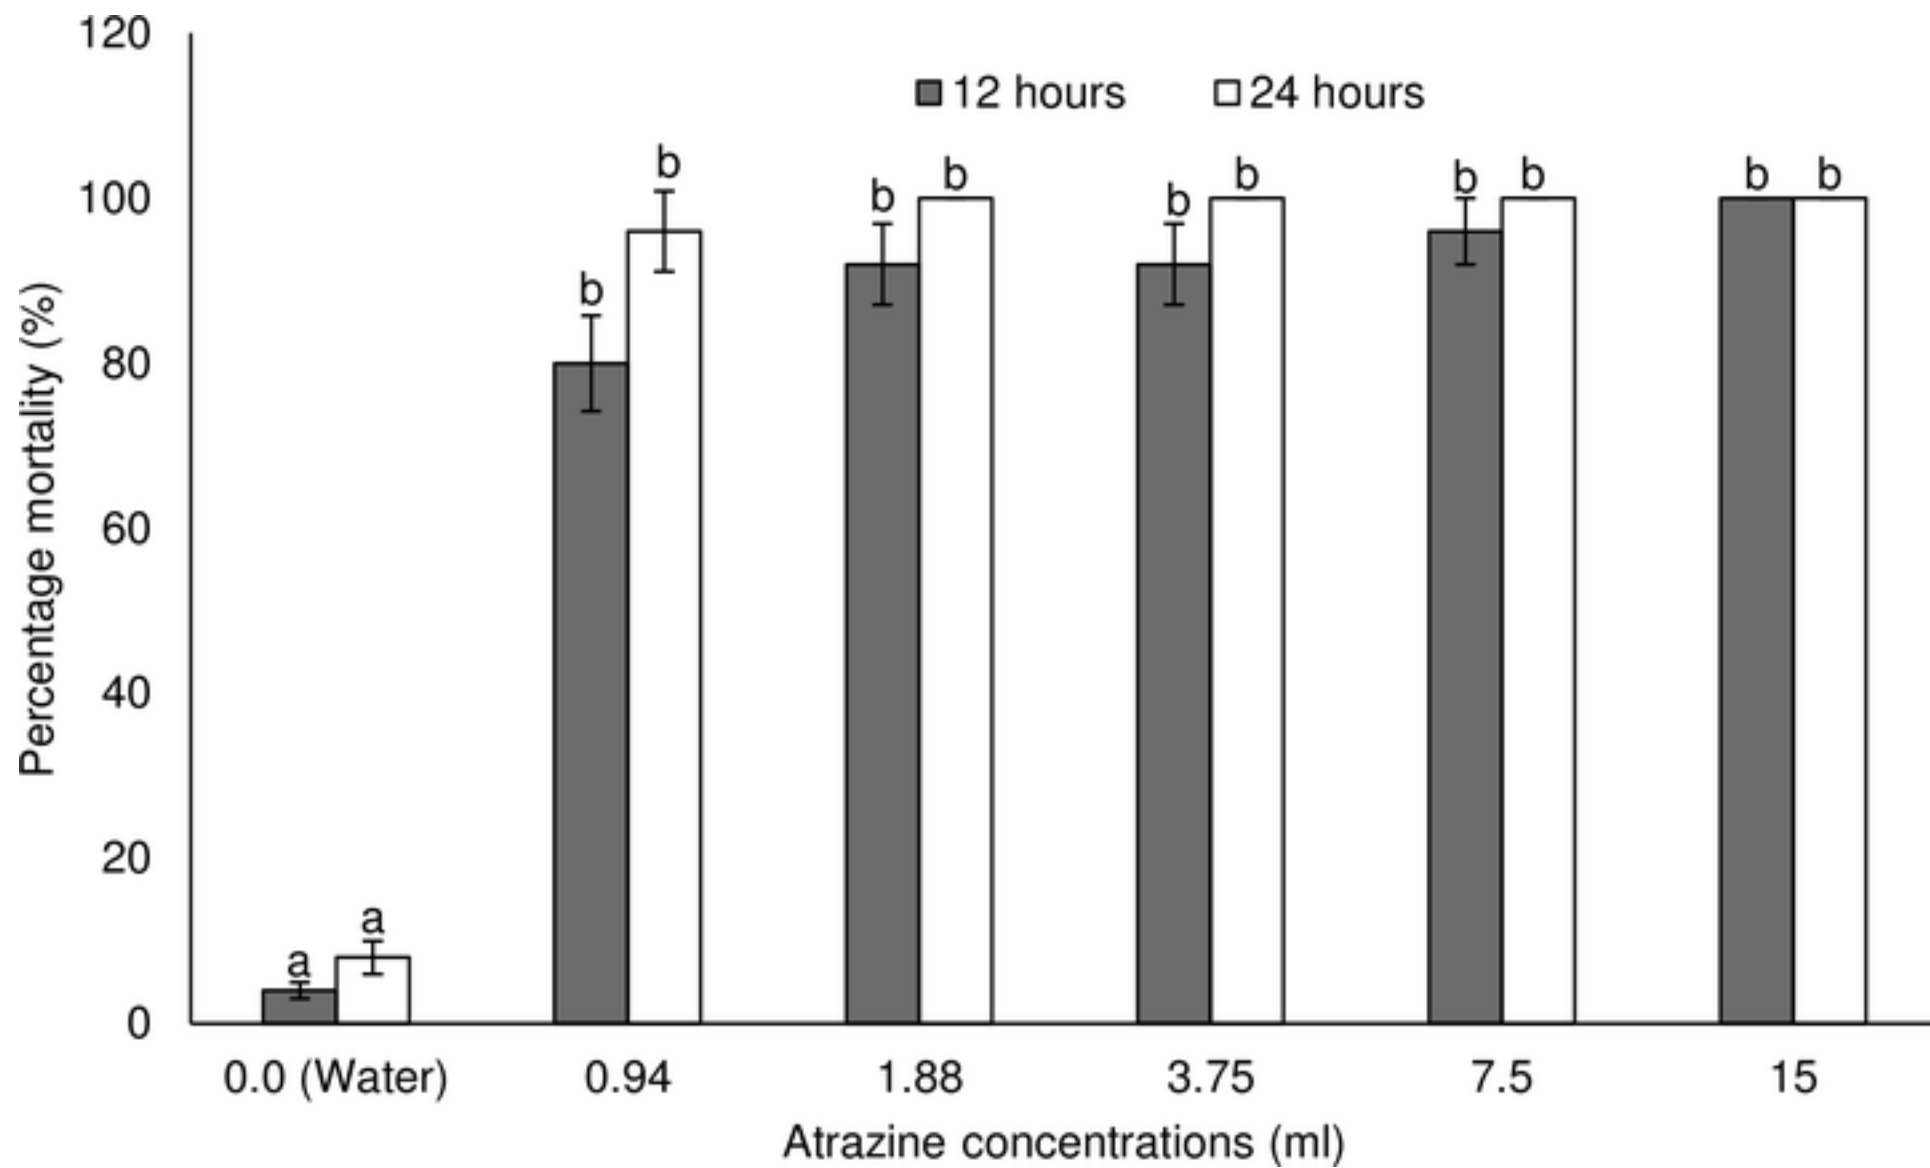

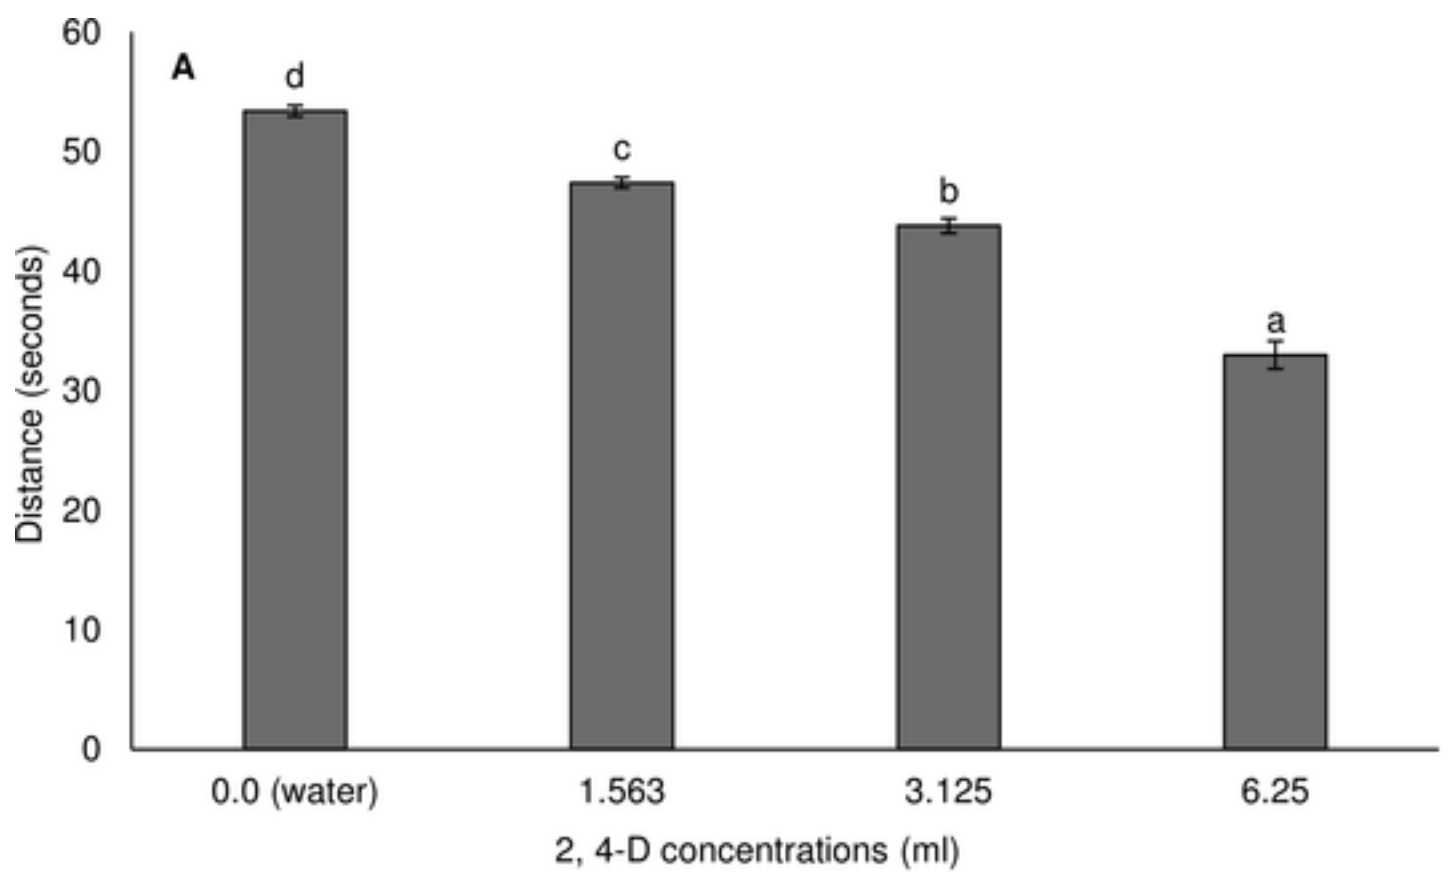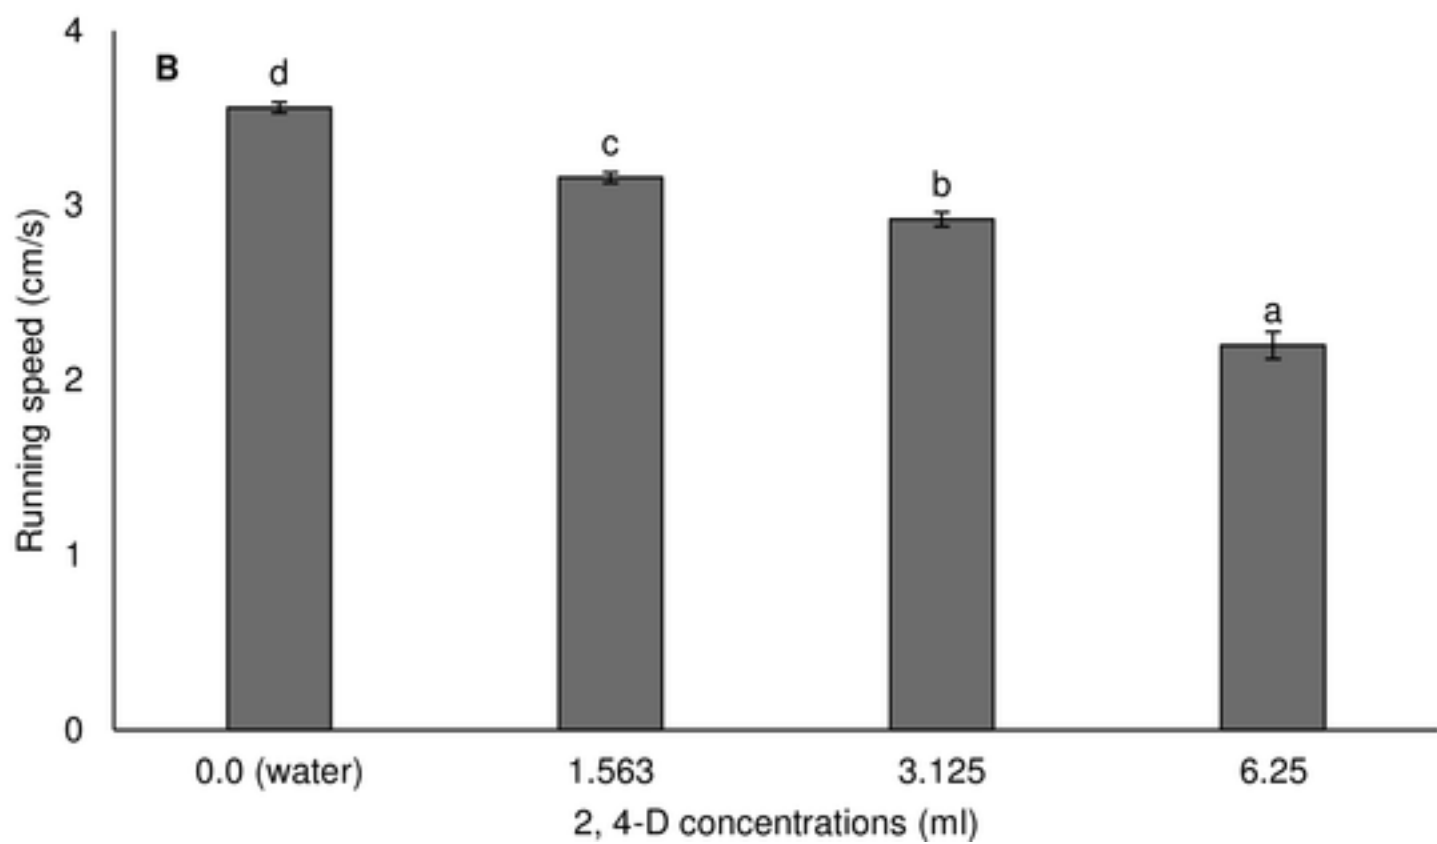

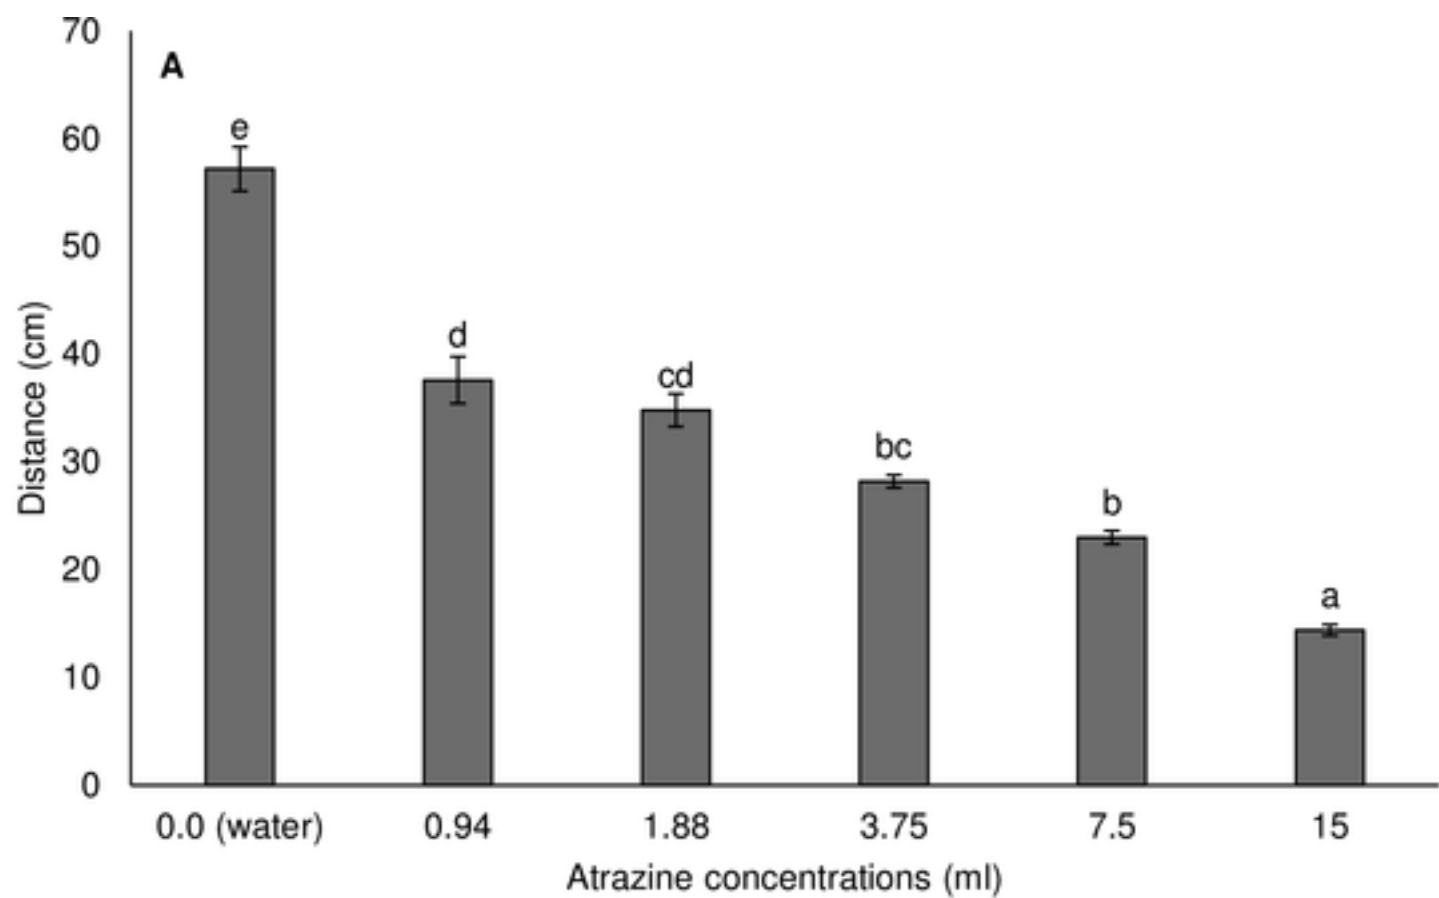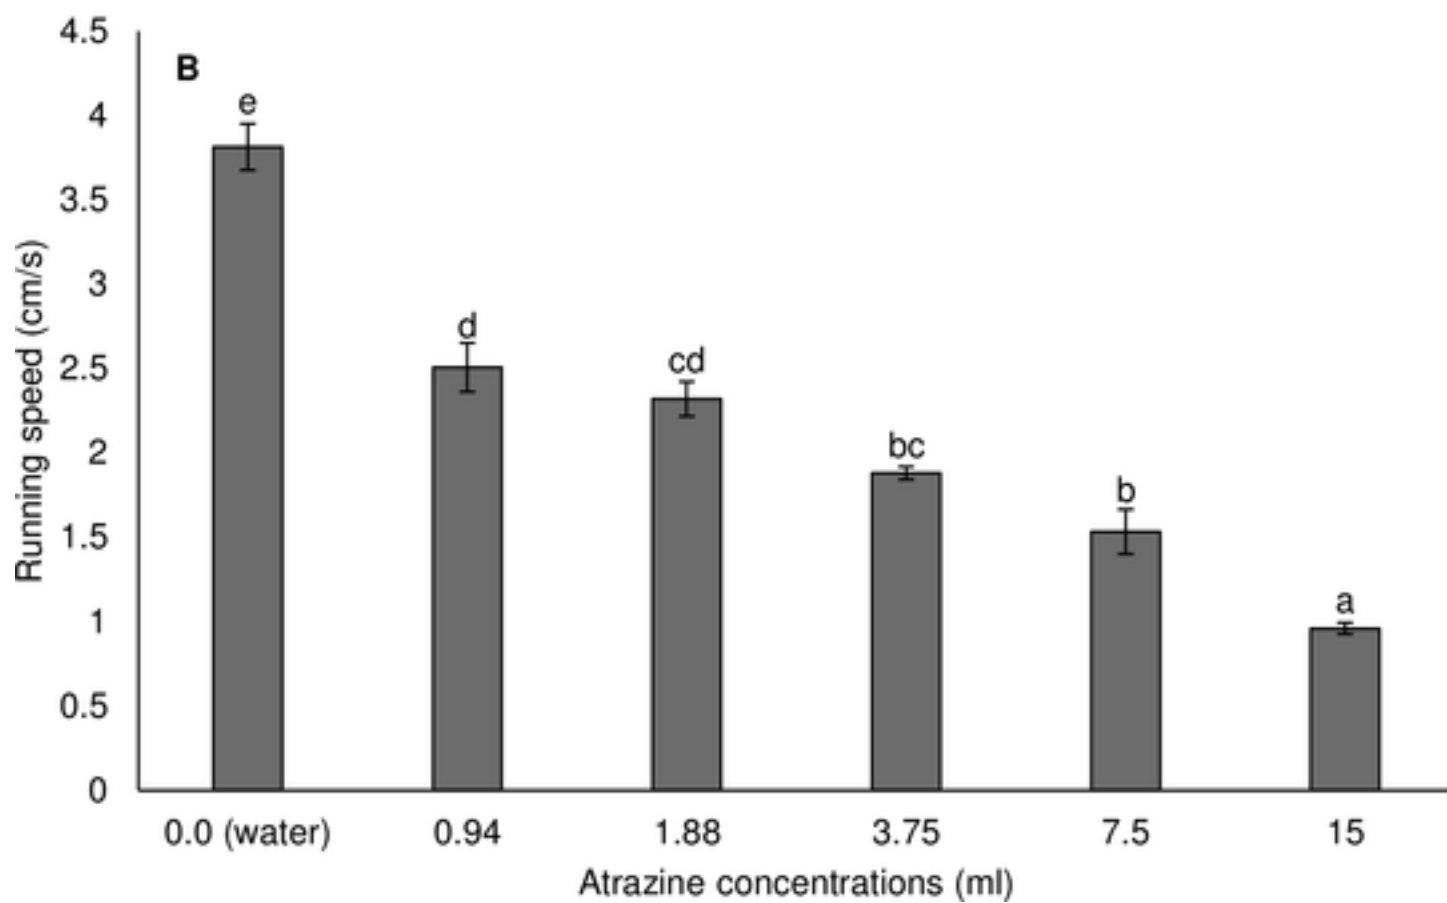

Supplement: pone.0230664.s001.pdf [file pone.0230664.s001.pdf]
